# Supplementary material for: Fire-climate interactions through aerosol radiative effect in a global chemistry-climate-vegetation model
Source: Copernicus journal article supplement (doi:10.5194/acp-2022-175), 2022-04-04
Supplement: Supplementary file 1 [file acp-2022-175-supplement.pdf]

1 *Supplement of*

2 **Fire-climate interactions through aerosol radiative effect in a global chemistry-climate-**  
3 **vegetation model**

4 Chenguang Tian<sup>1,2</sup>, Xu Yue<sup>1</sup>, Jun Zhu<sup>1</sup>, Hong Liao<sup>1</sup>, Yang Yang<sup>1</sup>, Yadong Lei<sup>3</sup>, Xinyi Zhou<sup>1</sup>, Hao  
5 Zhou<sup>2</sup>, Yimain Ma<sup>2</sup>, Yang Cao<sup>2</sup>

6 <sup>1</sup> Jiangsu Key Laboratory of Atmospheric Environment Monitoring and Pollution Control,  
7 Collaborative Innovation Center of Atmospheric Environment and Equipment Technology, School  
8 of Environmental Science and Engineering, Nanjing University of Information Science &  
9 Technology (NUIST), Nanjing, 210044, China

10 <sup>2</sup> Climate Change Research Center, Institute of Atmospheric Physics, Chinese Academy of Sciences,  
11 Beijing, 100029, China

12 <sup>3</sup> State Key Laboratory of Severe Weather & Key Laboratory of Atmospheric Chemistry of CMA,  
13 Chinese Academy of Meteorological Sciences, Beijing, 100081, China

14

15 **Corresponding author:** Xu Yue (Email: yuexu@nuist.edu.cn)

16

17

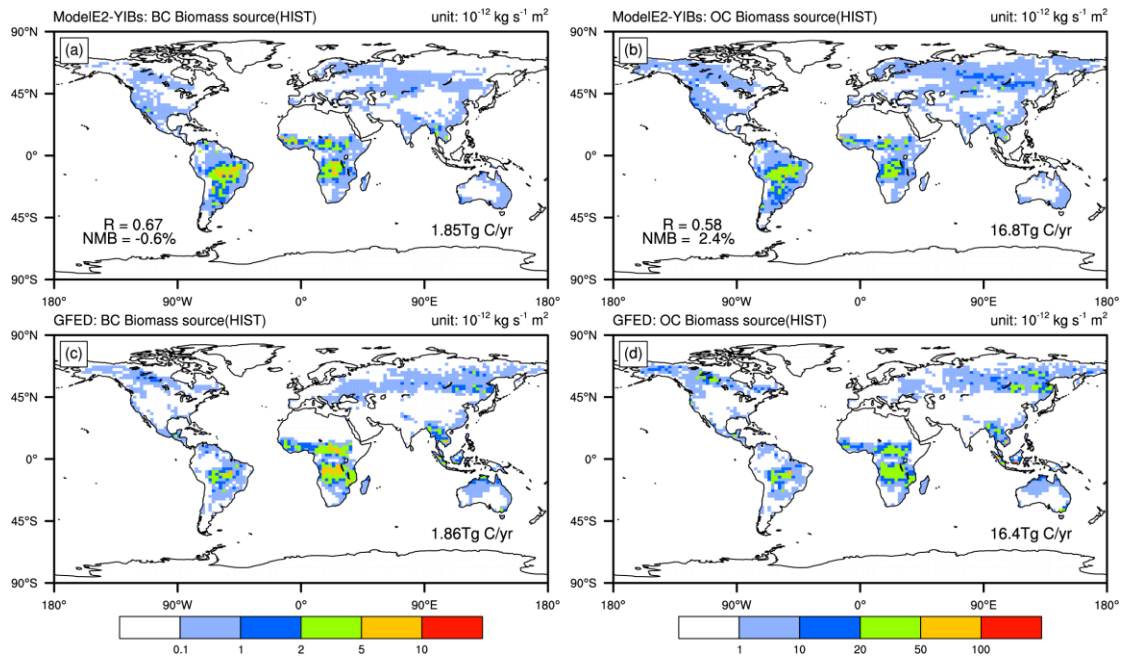

18  
19  
20  
21  
22  
23

**Fig. S1** Annual mean fire emissions of (left) BC and (right) OC (a, b) simulated by ModelE2-YIBs and (c, d) observed from GFED4.1s. Modeling results are from the simulation of YF\_AD\_AI\_AA. The total emissions are shown on the bottom right of each panel. The correlation coefficients and normalized mean biases between simulations and observations are shown on the top panels.

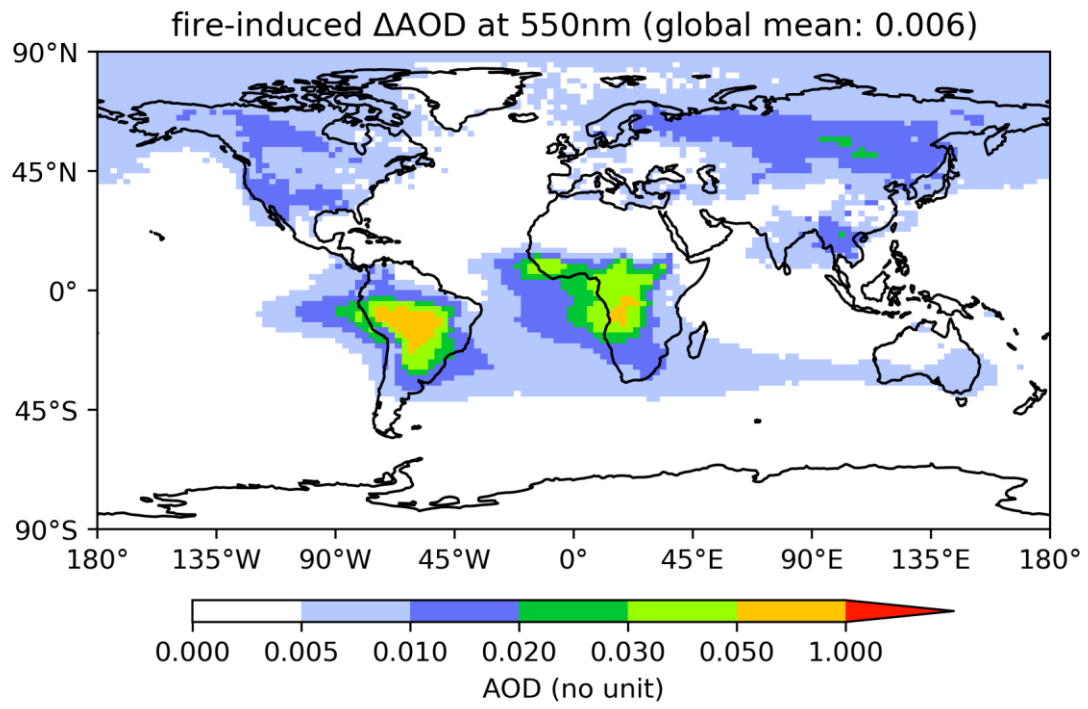

24

25 **Fig. S2** Annual mean changes in AOD at 550 nm induced by fire.

26

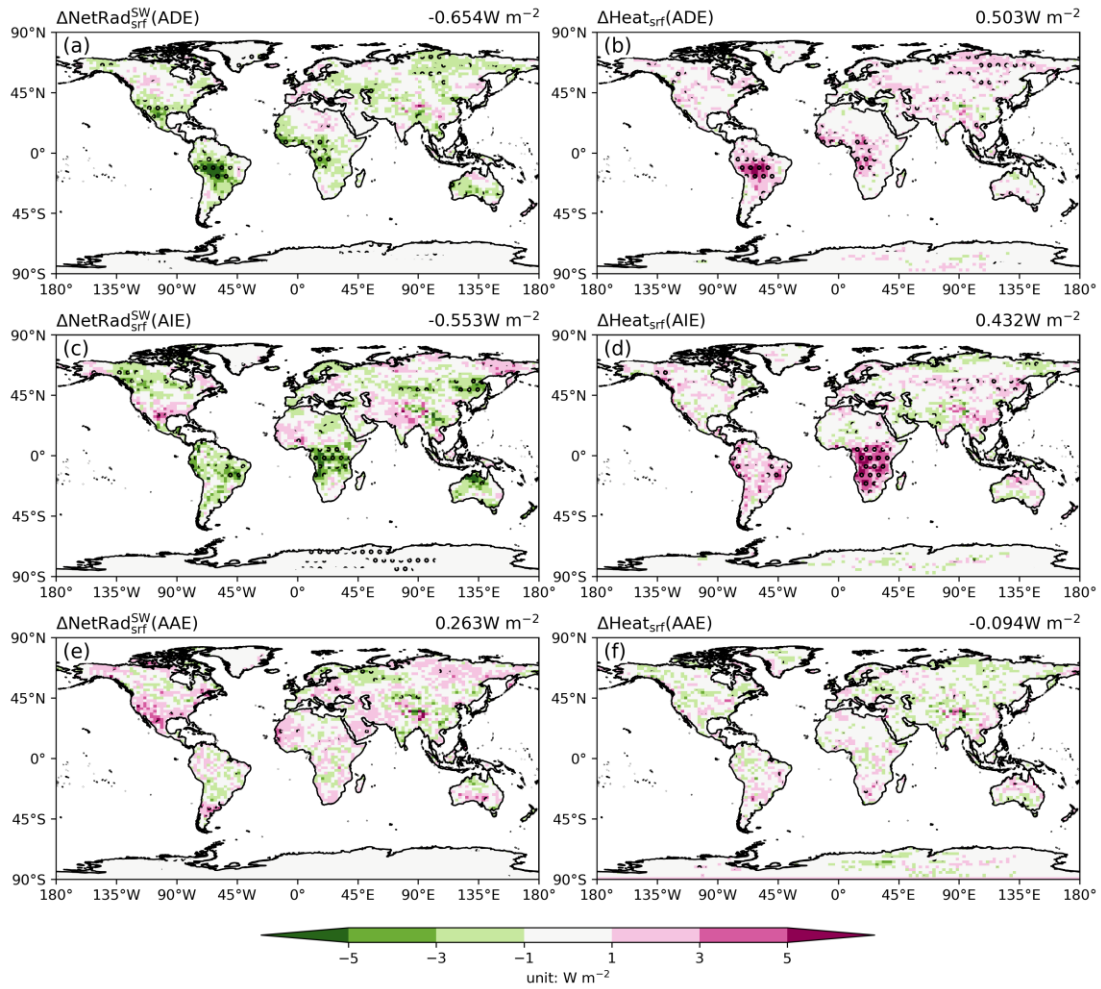

27

28 **Fig. S3** Changes in surface (left) net shortwave and (right) heat fluxes (sensible + latent) due to (top)  
 29 direct effects, (middle) indirect effects, and (bottom) BC-snow feedback of fire aerosols over land  
 30 grids. Positive values represent the increase of downward radiation. Global land average is shown  
 31 at the top of each panel. Dots denote areas with significant ( $p < 0.1$ ) changes.

32

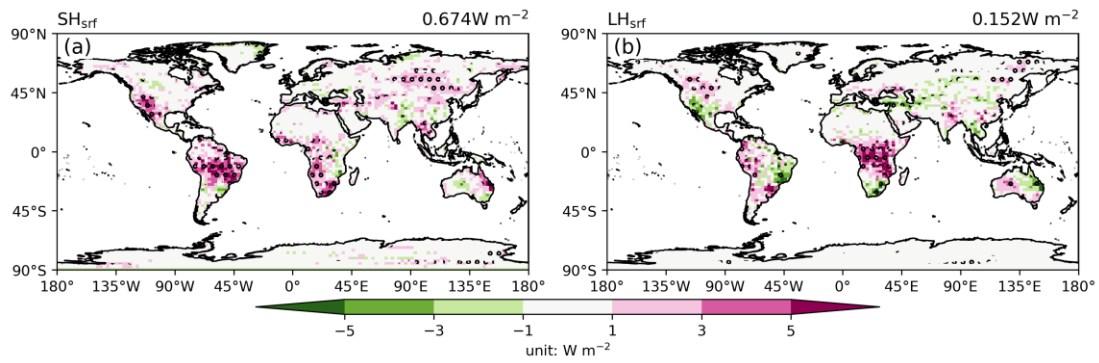

33  
 34  
 35  
 36  
 37  
 38

**Fig. S4** Changes in surface (a) sensible and (b) latent heat fluxes caused by fire aerosols. Positive values represent the increase of downward radiation. Global average value is shown at the top of each panel. Dots denote areas with significant ( $p < 0.1$ ) changes.

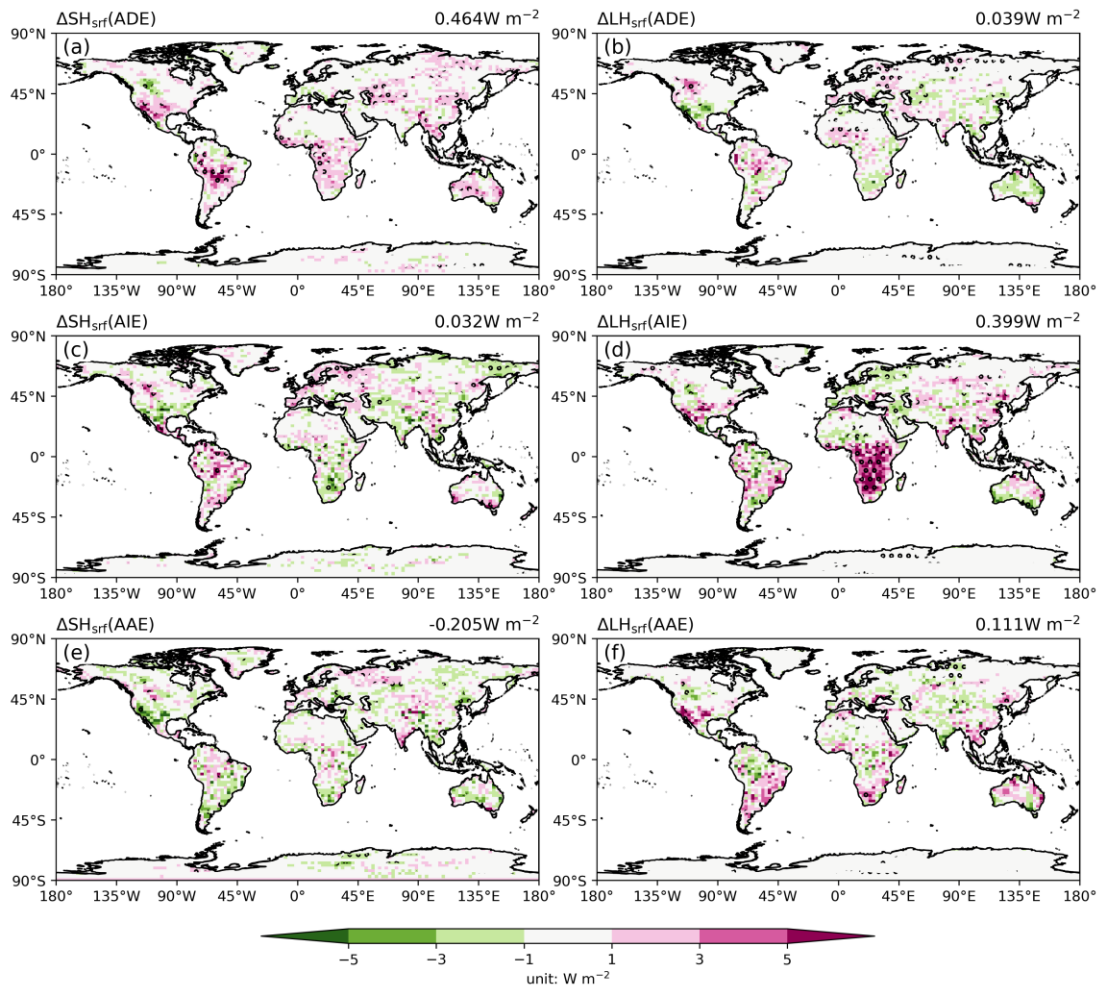

39  
 40  
 41  
 42  
 43  
 44  
 45

**Fig. S5** Changes in surface (left) sensible and (right) latent heat fluxes due to (top) direct effects, (middle) indirect effects, and (bottom) BC-snow feedback of fire aerosols over land grids. Positive values represent the increase of downward radiation. Global land average is shown at the top of each panel. Dots denote areas with significant ( $p < 0.1$ ) changes.
